# Supplementary material for: LINC00116-encoded microprotein mitoregulin regulates fatty acid metabolism at the mitochondrial outer membrane
Source: PubMed Central journal article supplement — iScience. 2023 Aug 7;26(9):107558. doi: 10.1016/j.isci.2023.107558 (PMC10469944; doi:10.1016/j.isci.2023.107558), 2023-08-07
Supplement: mmc1.pdf [file mmc1.pdf]

**Supplemental information**

***LINC00116*-encoded microprotein mitoregulin**

**regulates fatty acid metabolism**

**at the mitochondrial outer membrane**

**Shan Zhang, Yabo Guo, Gio Fidelito, David R.L. Robinson, Chao Liang, Radiance Lim, Zoë Bichler, Ruiyang Guo, Gaoqi Wu, He Xu, Quan D. Zhou, Brijesh K. Singh, Paul Yen, Dennis Kappei, David A. Stroud, and Lena Ho**

**A**

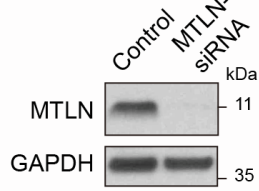

**B**

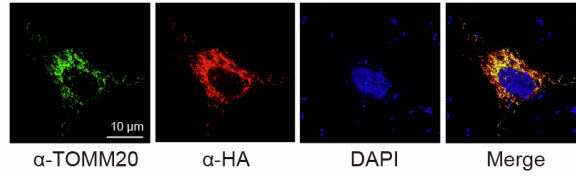

**C**

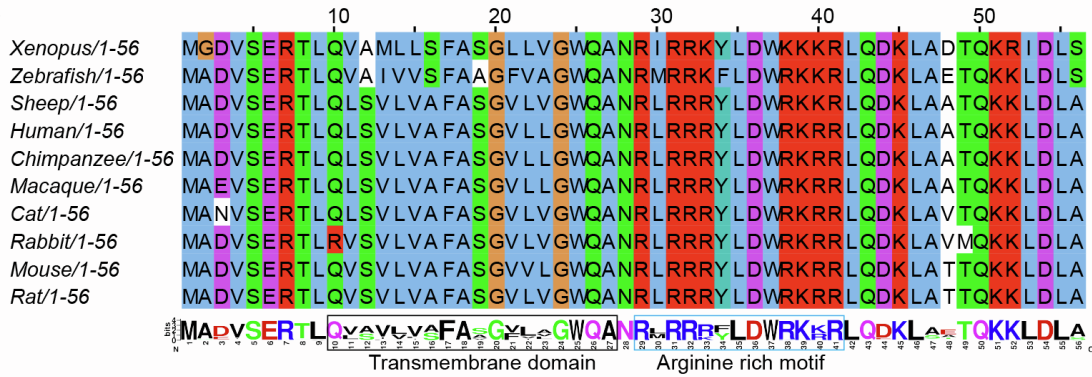

**D**

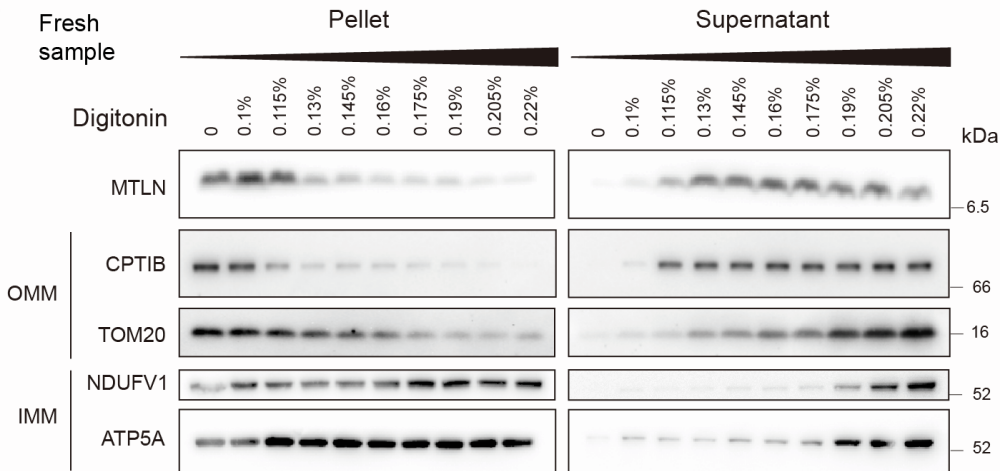

**E**

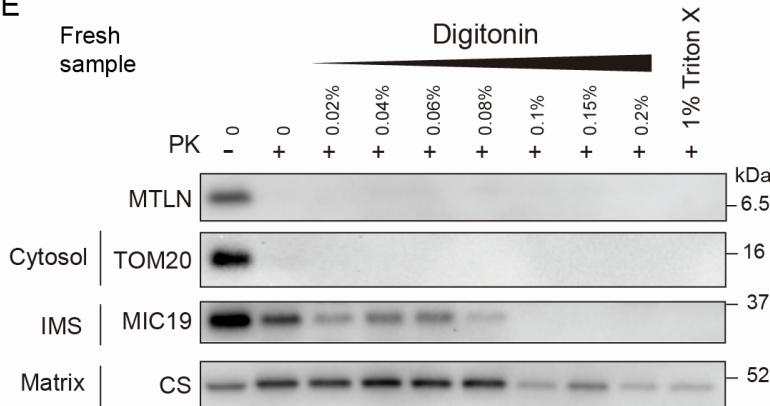

**F**

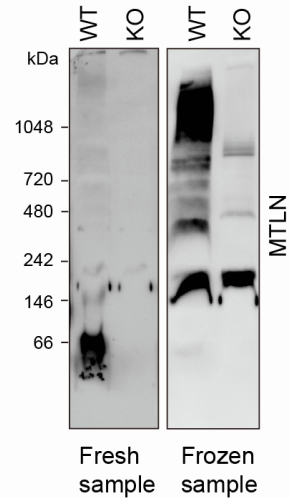

**Figure S1. Microprotein MTLN is localized to the outer membrane of mitochondria, Related to Figure 1.**

(A) Knock-down of MTLN in U2OS cells by siRNA.

(B) Co-immunostaining of HA tagged MTLN with mitochondrial marker TOMM20 in HeLa cell.

(C) Sequence alignment of MTLN homologs. Positions of the transmembrane domain and the arginine rich motif are indicated.

(D) Solubilization of mitochondrial proteins isolated from freshly dissected mouse skeletal muscle by a gradient of digitonin.

(E) Protease sensitivity assay of mitochondrial proteins isolated from freshly harvested C2C12 myoblast.

(F) Mobility of MTLN analysed by native-PAGE in mitochondria isolated from freshly dissected and frozen mouse skeletal muscle. Mitochondria were solubilized for native-PAGE right after the isolation.

A

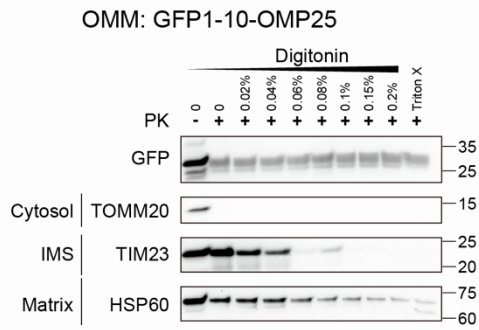

B

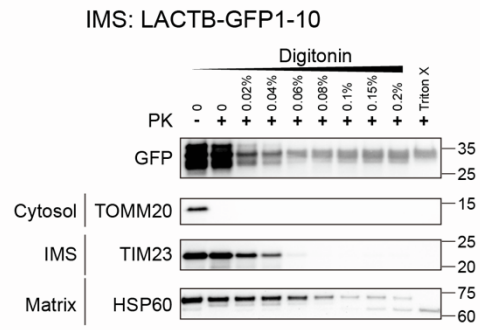

C

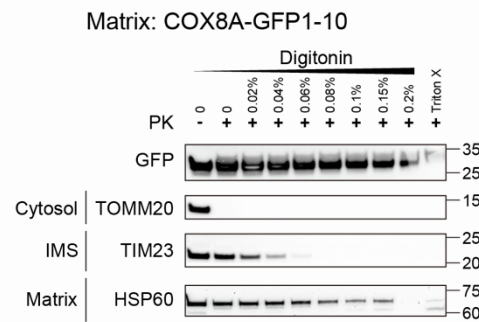

E

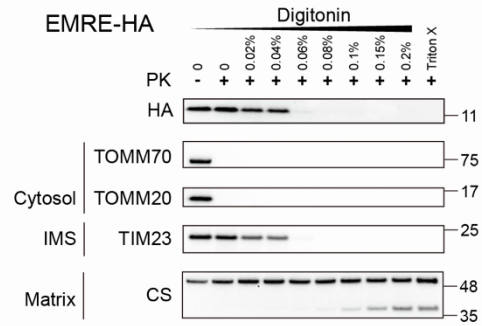

D

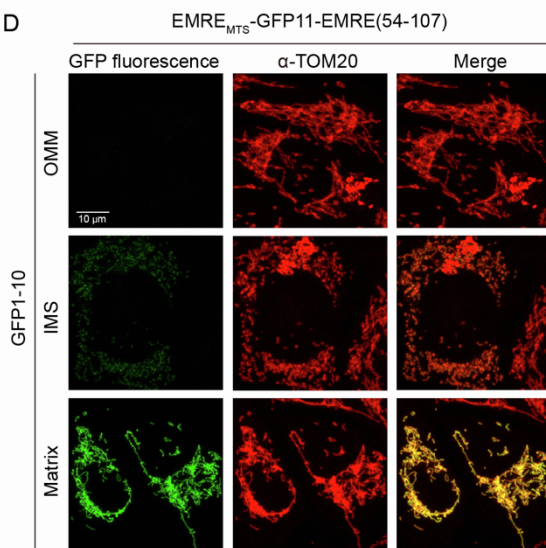

F

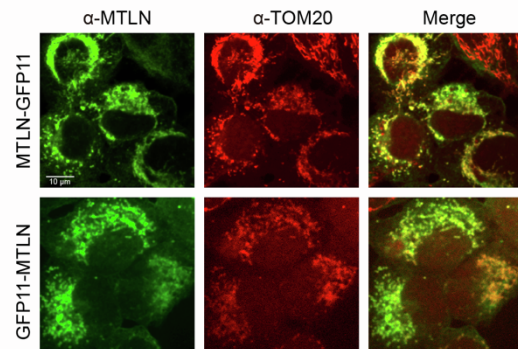

G

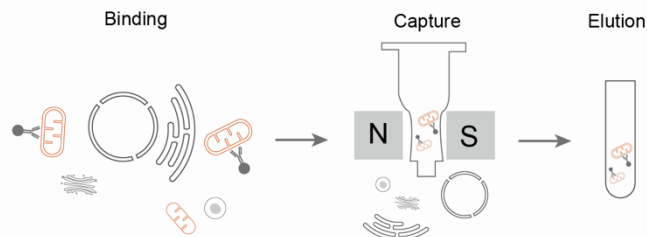

H

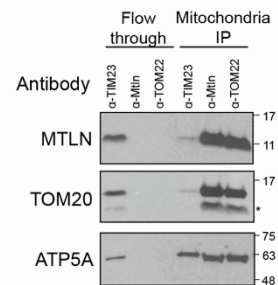

**Figure S2. In vivo protein topology analysis confirms the OMM localization of MTLN, Related to Figure 2.**

(A) Protease sensitivity assay of OMM GFP1-10 (GFP1-10-OMP25). TOM20, TIM23, and HSP60 are markers of cytosolic side of OMM, IMS, and matrix, respectively. A small fraction of GFP1-10 remained resistant to protease under fully solubilization of membrane by Triton X. This set of experiments were done using HEK293T cells transfected with GFP1-10 constructs. Mitochondria were isolated from freshly harvested cells and used for the assay.

(B) Protease sensitivity assay of IMS GFP1-10: LACTB-GFP1-10.

(C) Protease sensitivity assay of matrix GFP1-10: COX8A-GFP1-10.

(D) Representative GFP fluorescence and TOM20 staining signals of HEK293T cells co-transfected with EMRE<sub>MTS</sub>-GFP11-EMRE(54-107) and OMM, IMS, and matrix GFP1-10.

(E) Protease sensitivity assay of EMRE-HA.

(F) Immunostaining of MTLN and TOM20 in HEK293T cells transfected with GFP11-MTLN and MTLN-GFP11 constructs.

(G) Schematic diagram for antibody-based mitochondria purification.

(H) MTLN antibody purified mitochondria as efficient as the TOM22 antibody. Cytosolic homogenate of wild type HEK293T cell was incubated with magnetic protein A beads coated with indicated antibodies. TOM20 and ATP5A are markers OMM and IMM, respectively.

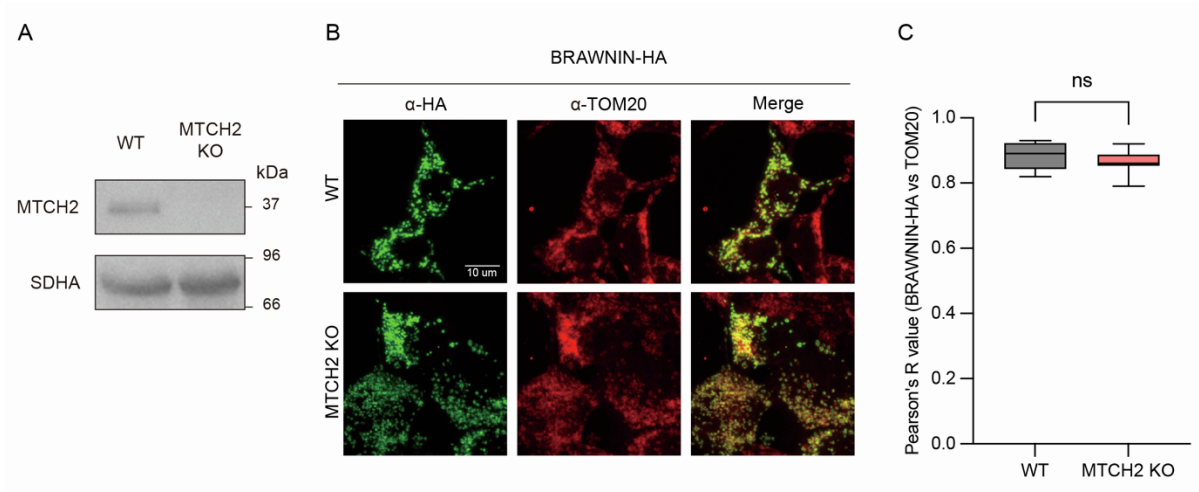

**Figure S3. Mitochondrial targeting of MTLN is impaired by the deficiency of OMM  $\alpha$ -helical protein insertase, Related to Figure 3.**

(A) Western validation of the MTCH2 KO HEK293T cell generated by CRISPR-Cas9 based gene editing.

(B) Immunostaining of HA and TOM20 in WT and MTCH2 KO HEK293T cells transfected with the IMM  $\alpha$ -helical protein BRAWNIN-HA.

(C) Quantitative analysis of mitochondrial localization of BRAWNIN-HA in WT and MTCH2 KO HEK293T cells. Pearson's correlated values between HA and TOM20 signals were calculated for individual cells using ImageJ and plotted. Error bars of the box plot shows the minimum and maximum values with boxes extend from the 25th to 75th percentiles, and the  $p$ -value was calculated by unpaired t-test.

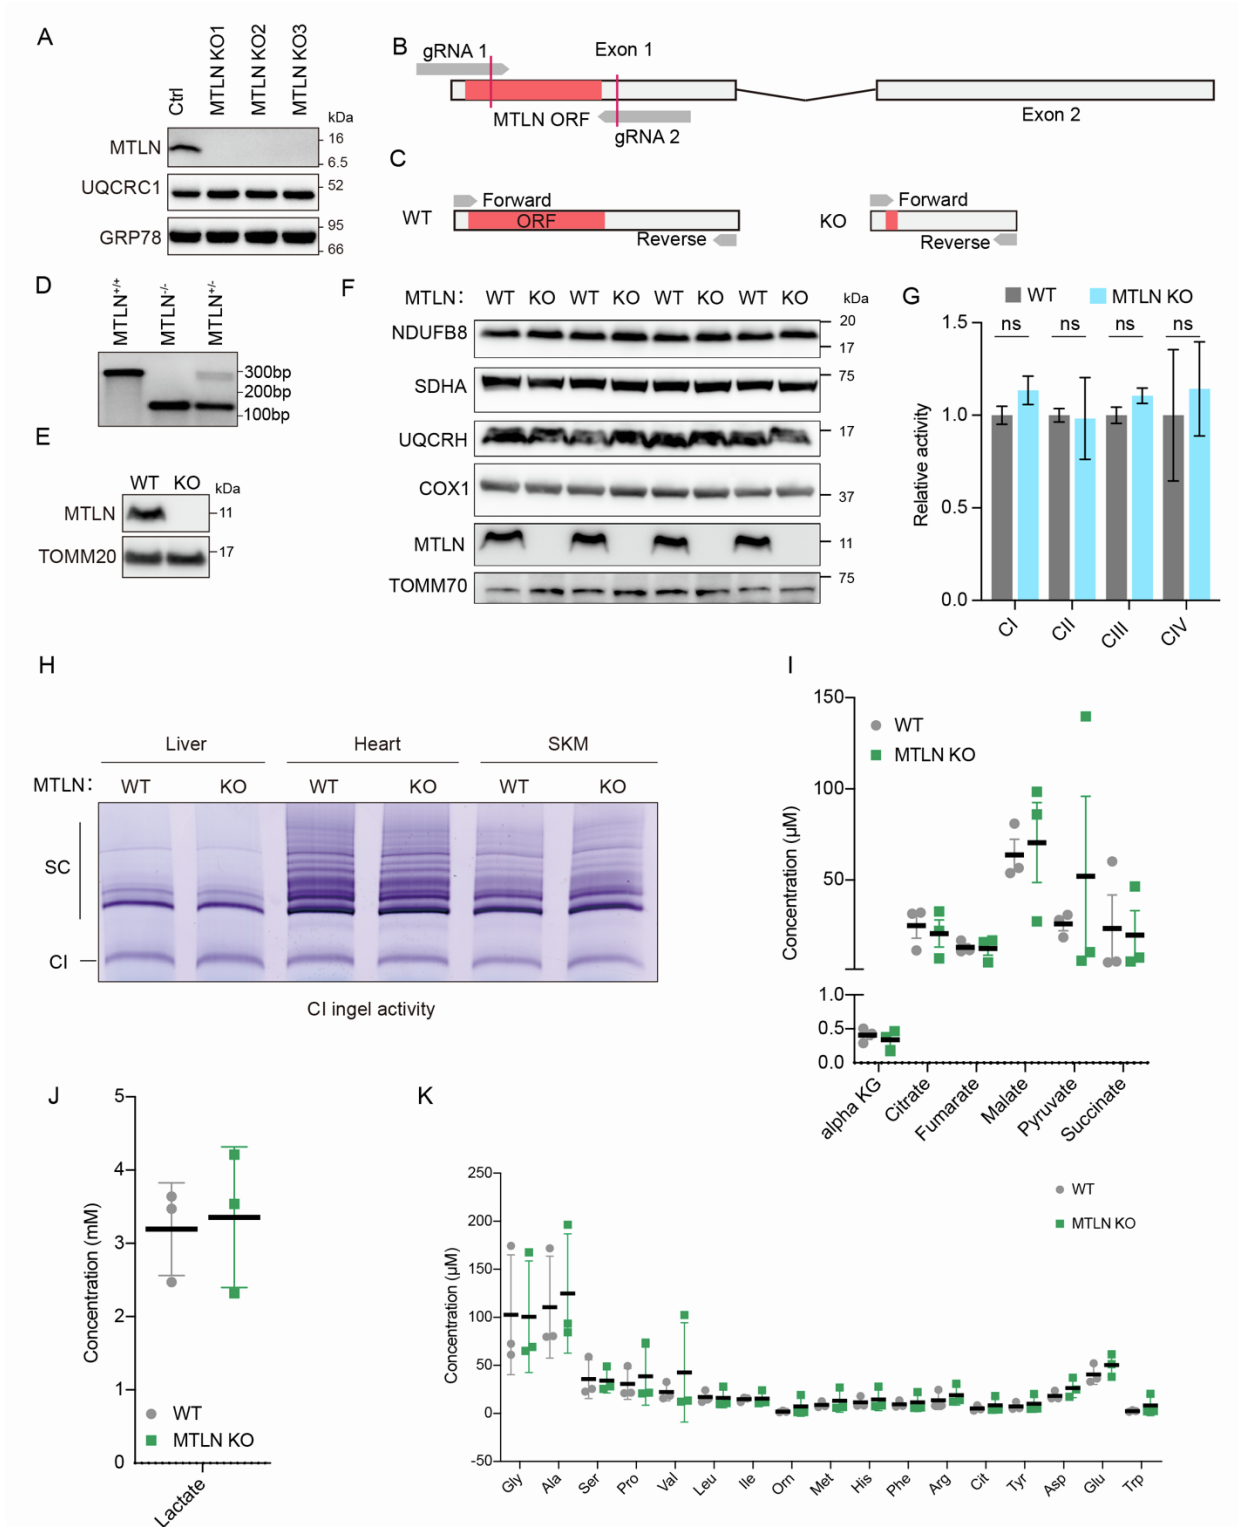

**Figure S4. Loss of MTLN does not impair mitochondrial respiratory chain, Related to Figure 4.**

(A) Validation of MTLN KO C2C12 cell lines by immunoblotting.

- (B) Design of gRNAs in the generation of MTLN global KO in mouse.
- (C) Schematic diagram of the mouse genotyping strategy.
- (D) Validation of MTLN KO in mouse by PCR.
- (E) Validation of MTLN KO in mouse heart by protein immunoblotting.
- (F) Western analysis of respiratory chain subunits in heart mitochondria of WT and MTLN KO mice. NDUFA8, SDHA, UQCRH, and COX1 are subunits of respiratory chain complex I-IV, respectively.
- (G) Enzymatic activities of respiratory chain complexes measured using heart mitochondria of WT and MTLN KO mice. Mean and SEM of four biological replicates are shown, p-values were calculated from two-sided, unpaired t-test.
- (H) A zoom-in view of the complex I in gel assay shown in Fig. 4B. Positions of complex I (CI) and supercomplexes (SC) are denoted.
- (I) Abundance of organic acids measured by mass spectrometry in mouse skeletal muscles.
- (J) Similar to (I), lactate was measured.
- (K) Similar to (I), amino acids were measured.



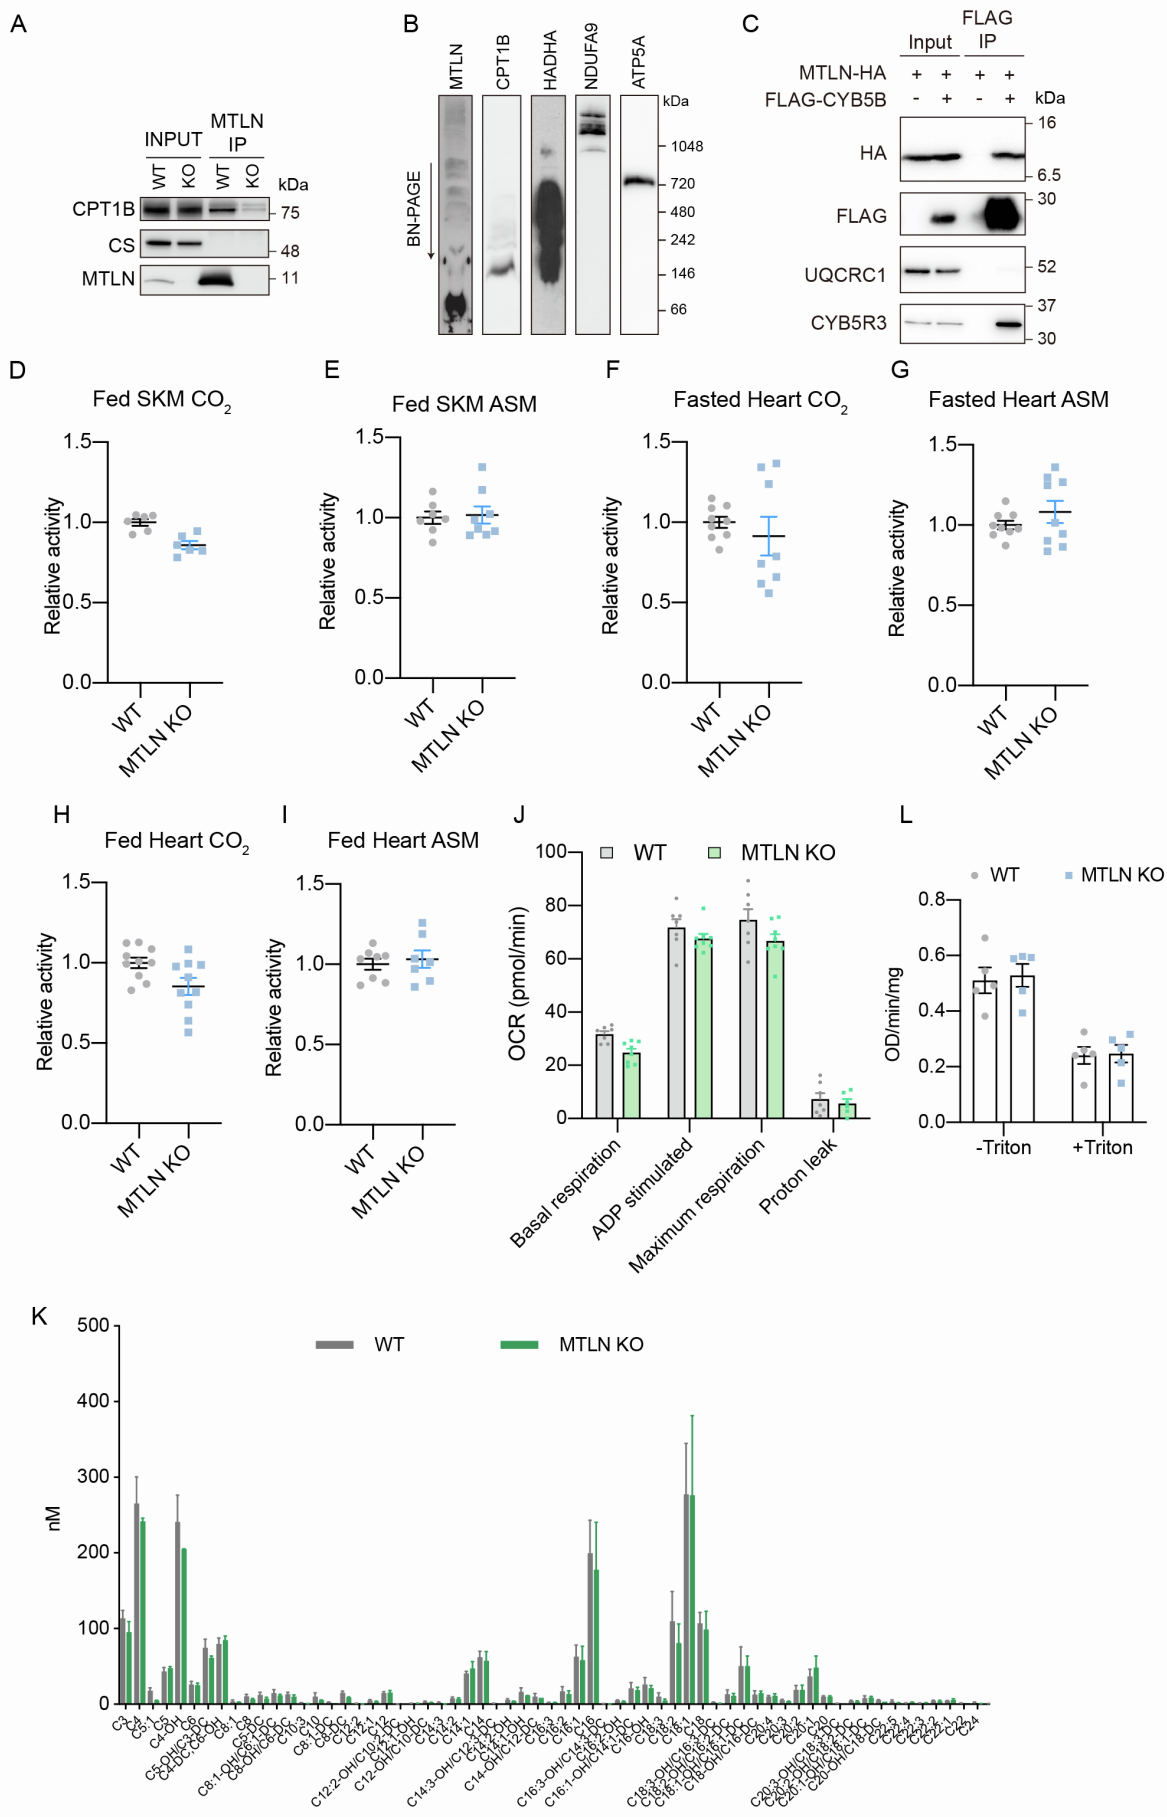

**Figure S5. MTLN is required for cellular fatty acid metabolism, Related to Figure 5.**

- (A) Western validation of the physical interaction between endogenous MTLN and CPT1B. Endogenous MTLN was immuno-isolated from mouse hearts.
- (B) BN-PAGE analysis of MTLN, CPT1B, HADHA, NDUFA9, and ATP5A using mitochondria isolated from mouse heart.
- (C) Western validation of the physical interaction between MTLN and CYB5B. HA-tagged MTLN and FLAG-tagged CYB5B are expressed from HEK293T cells. FLAG-CYB5B served as the bait.
- (D) Oxidation of radioactive palmitic acid as measured by the production of  $^{14}\text{C}$  labeled  $\text{CO}_2$  in skeletal muscle homogenate. Skeletal muscle homogenates were freshly isolated from fed animals.
- (E) As in panel C, oxidation of radioactive palmitic acid as measured by the production of acid soluble metabolites (ASM).
- (F-G) Similar to Fig.4D and E, heart tissue homogenates were prepared from animals fasted for 12 h and assayed for the oxidation of radioactive palmitic acid in forms of  $\text{CO}_2$  and ASM production.
- (H-I) Similar to panel E to F, heart homogenates were prepared from fed animals.
- (J) Rate of mitochondrial respiration was measured by Seahorse using palmitoyl-carnitine as the substrate. Purified mouse heart mitochondria were used in this assay.
- (K) Mouse skeletal muscle acylcarnitine profiles was measured by targeted metabolomics.
- (L) Enzymatic activity of CPT1 was measured using purified mouse heart mitochondria.

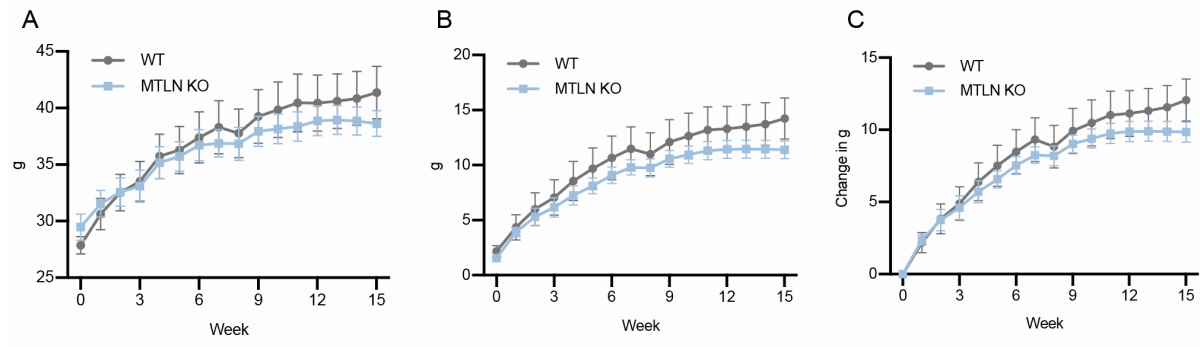

**Figure S6. Loss of MTLN protects mouse from diet-induced insulin resistance, Related to Figure 6.**

(A) Body weight of animals under the WDF diet in a 16-week feeding.

(B) Body fat mass of animals under WDF diet feeding as determined by quantitative MRI.

(C) Change in body mass of animals under WDF diet feeding as determined by quantitative MRI.
